# Supplementary material for: Preparation of hexaaza and heptaaza macrocycles functionalized with a single aminoalkyl pendant armElectronic supplementary information (ESI) available: preparative details for compounds which have been reported previously. See http://www.rsc.org/suppdata/ob/b2/b210663a/
Source: Royal Society of Chemistry journal article supplement (doi:10.1039/b210663a), 2003-02-11
Supplement: b210663a.doc [file b210663a.doc]

Supplementary Material for Organic & Biomolecular Chemistry

This journal is © The Royal Society of Chemistry 2003

# Supplementary data

# Supplementary Material

# Preparation of hexaaza and heptaaza macrocycles functionalized with a single aminoalkyl pendant arm

#### Zhibo Zhang, Satu Mikkola and Harri Lönnberg*

Department of Chemistry, University of Turku, FIN-20014, Turku, Finland

***N*-(2-Aminoethyl)-*p*-toluenesulfonamide** (**4**)**.** A solution of ethylene diamine (4.5 g, 75 mmol) in anhydrous pyridine (15 cm3) was cooled to –13 oC, 0.25 equiv. of TsCl (3.53 g, 18.53mmol) was added drop-wise, and the mixture was stirred for 2h. Cold water (100 cm3) was added, the product (**4**) was extracted to EtOAc, and the organic phase was dried with Na2SO4. Removal of the solvent under reduced pressure gave a yellowish solid, which was purified by silica column chromatography (CH2Cl2: MeOH, 92:8, *v/v*) to obtain **4** as white solid in a 57 % (2.25 g) yield. M.p. 122-123 oC (lit. 112-114 oC,46 121-123 oC,47 127-128 oC48). *m/z* (ESI) 215.5 (M+H+). The 1H NMR spectrum in CDCl3 was identical with that reported in literature.48

***N*-(2-Tosyloxyethyl)-*p*-toluenesufonamide (5)**.A solutionof TsCl (80.26 g, 420 mmol) in anhydrous pyridine (120 cm3) was cooled to –40 oC, 0.48 equiv. of ethanolamine (12.22 g, 200 mmol) was added drop-wise while continuously stirred. The stirring was continued at –10oC for 1 h, and then at 0 oC overnight. The mixture was poured on ice, which resulted in precipitation of **5** as an orange solid. Recrystallization from EtOH afforded **5** as a white solid in a 70 % (52.6 g) yield. M.p. 86.5-88.5 oC (lit. 86-87 oC,49 86.5-88.538, 87-88 oC50). The 1H NMR spectrum in CDCl3 was identical with that reported in literature.38,45 *m/z* (ESI)370.4 (M+H+).

***N*-Tosylaziridine (6)**. A solution of 20 % aqueous KOH (30 cm3) was rapidly added to **5** (9.1 g, 25 mmol) in toluene (82 cm3). The two-phase mixture was vigorously stirred, which resulted in an appearance of a pink color and a white solid. The reaction was completed in 0.5 h (TLC monitoring). The mixture was then washed with water, and the toluene phase was dried with Na2SO4. Evaporation of the solvent gave **6** as white crystals (93 %, 4.6 g). M. p. 52-56 oC (lit. 63-64 oC).38,45,51 According to *Ref*. 38 some batches melted at 52-53 oC without any difference in spectra or reactivity. The 1H NMR spectrum in CDCl3 was identical with that reported in literature.38 *m/z* (ESI) 198.3 (M+H+).

***N*1,*N*5-Ditosyl-3-azapentane-1,5-diamine (7).** Compd. **4** (4.28 g, 20 mmol) was dissolved in dry MeCN (100 cm3) and heated to reflux under an inert atmosphere. Compd. **6** (3.94 g, 20 mmol) in dry MeCN (50 cm3) was added dropwise over a period of several hours. The mixture was cooled, and evaporated to yellow oil. Purification by Silica gel chromatography (CH2Cl2: MeOH = 98 : 2) gave **7** as a white solid in a 71 % (5.86 g) yield. M.p. 53.8-55.7 (lit. 59-61 oC38) The 1H NMR spectrum in CDCl3 was identical with that reported in literature.38 13C NMR: 143.4, 136.6, 129.7, 127.0, 47.7, 42.5, 21.5. νmax (KBr)/cm-1 3327, 1325. *m/z* (ESI)412.6 (M+H+).

**3-Benzoyl-*N*1,*N*5-ditosyl-3-azapentane-1,5-diamine (8)**. Compd. **7** (4.11 g, 10 mmol) was suspended under N2 in dry benzene (70 cm3) containing a slight excess of triethylamine. Benzoyl chloride (1.64g, 11.65 mmol) was slowly added at 5 oC. The mixture was stirred overnight. The white solid was filtrated, washed with benzene and water, dissolved in CH2Cl2 and washed again with water to remove the residual triethylamine hydrochloride. The organic layer was dried with K2CO3 and evaporated to a white solid. Purification by Silica gel chromatography (CH2Cl2: MeOH 98 : 3) gave **8** as a white solid in 80 % (4.12 g) yield. M.p. 170-172 oC (lit. 171.0-172.838). The 1H NMR spectrum in CDCl3 was identical with that reported in literature.38 13C NMR: 173.5, 143.5, 136.7, 135.7, 129.8, 129.7, 128.6, 127.0, 126.7, 41.4, 21.5. νmax (KBr)/cm-1 3329, 1620, 1329.*m/z* (ESI) 516.4 (M+H+), 538.4(M+Na+), 554.4(M+K+).

***N*1,3,6,*N*8-Tetratosyl-3,6-diazaoctane-1,8-diamine (9a)**.*p*-Toluenesulfonyl chloride (8.38 g, 44 mmol) and a catalytic amount of DMAP was dissolved in dry pyridine by stirring at 60 oC. A solution of triethylene tetramine (1.46 g, 10 mmol) in pyridine (25 cm3) was added during 10 h at 50-60 oC, and the reaction was maintained at the same temperature overnight. The cooled mixture was diluted with water (100 ml), and the stirring was continued for several hours. Upon cooling on an ice bath, a yellow solid was precipitated. The precipitate was thoroughly washed with ice-cold ethanol and purified by Silica gel chromatography (CH2Cl2: MeOH = 200 : 1) to obtain **9a** as a white solid in a 69 % (4.57 g) yield. M.p. 214.7-216.3 oC (lit. 215-217 oC,52 215-219 oC53). The 1H and 13C NMR spectra were identical with those reported in literature.51 νmax (KBr)/cm-1 3327, 1328, 1157. *m/z* (ESI) 763.6 (M+H+), 785.6 (M+Na+).

***N*1,3,*N*5-Tritosyl-3-azapentane-1,5-diamine (9b).** Compd. **9b** was prepared from diethylene triamine as described above for **9a**, with the exception that no DMAP was employed. M.p. 174.6 (lit. 180-181oC53). The 1H NMR spectrum was identical with that reported in literature.54,55 νmax (KBr)/cm-1 3327, 1328. *m/z* (FAB) 566 (M+H+, 100 %).

***N*1,4,*N*7-Tritosyl-4-azaheptane-1,7-diamine (9c).** Compd. **9c** was prepared from bis(3-aminopropyl)amine as described above for **9a**, with the exception that no DMAP was employed. Because of the hygroscopic nature of the compound, a melting temperature could not be determined; a value of 112 oC has been reported in the literature.56 The 1H and 13C NMR spectra in CDCl3 were identical with those reported in literature.56 νmax (KBr)/cm-1 3327, 1328, 1157. *m/z* (FAB) 594 (M+H+).

**3,6,9,12-Tetratosyl-3,6,9,12-tetraazatetradecane-1,14-diol (10a).** A mixture of **9a** (2.29 g, 3.00 mmol), ethylene carbonate (0.58 g, 6.7 mmol) and powdered potassium hydroxide (5.1 mg, 0.091 mmol) was stirred at 160-170 oC for 4 h, allowed to cool to 90 oC, and large excess of MeOH (50 cm3) was rapidly added. The white solid precipitate was separated by filtration and purified by Silica gel chromatography to obtain **10a** in a 70 % (1.79 g) yield. M.p. 190.6 C (in lit. 214-216 oC57, 195-197 oC58). The 1H NMR spectrum in CDCl3 was identical with that reported in literature.58 νmax (KBr)/cm-1 3500, 1239, 1157. *m/z* (ESI) 851.6 (M+H+), 873.6 (M+Na+), 889.5 (M+K+).

**3,6,9-Tritosyl-3,6,9-triazaundecane-1,11-diol (10b).** Compd. **10b** was prepared from **9b** in a 75 % yield by the method described above for **10a**. M.p. 114.0-115.7 C (in lit. 110-112 oC40,55). The 1H NMR spectrum in CDCl3 was identical with that reported in literature.55,58 νmax (KBr)/cm-1 3329, 1238.*m/z* (FAB) 624 (M+H+, 100 %).

**1,14-Dimesyloxy-3,6,9,12-tetratosyl-3,6,9,12-tetraazatetradecane (11a).** A mixture of compd. **10a** (3.4 g, 4.00 mmol) and triethylamine (1.7 cm3) in dry dichloromethane was cooled to -15 to -20 oC, and methanesulfonyl chloride (0.653 cm3) was added over 10 min. The mixture was transferred on an ice bath, and the solution was stirred for 30 min. Crushed ice (100 cm3) and 10 % aq. hydrogen chloride (50 cm3) were added, and the mixture was thoroughly shaken. The organic layer was washed with water, dried over MgSO4, and evaporated to dryness to obtain a white solid. Purification by Silica gel chromatography (CH2Cl2: MeOH 200:1) gave **11a** in a 98 % (1.75 g) yield. The 1H NMR spectrum in CDCl3 was identical with that reported in literature.58 *m/z* (ESI)1007.6 (M+H+), 1029.6 (M+Na+).

**1,11-Dimesyloxy-3,6,9-tritosyl-3,6,9-triazaundecane (11b).** Compd. **11b** was prepared from **10b** in a 98 % yield as described above for **11a**. M.p. 148.2-148.6 (in lit. 146-148 oC39). The 1H NMR spectrum in CDCl3 was identical with that reported in literature.58 *m/z* (FAB) 810 (M+H+).

***N*1,3,*N*5-Tritosyl-*N*1,*N*5-divinyl-3-azapentane-1,5-diamine (12d).** Compd. **11b** when treated with either potassium carbonate in DMF at room temperature for 5 h underwent elimination to **12d**, observed previously by Clegg *et al.*58 The 1H NMR spectrum in CDCl3 was identical with that reported in literature.59 13C NMR (CDCl3): 144.1, 144.0, 135.6, 135.1, 131.7, 130.0, 129.9, 127.2, 127.0, 47.3, 44.1, 21.5. *m/z* (FAB) 618 (M+H+, 36 %).
